# Supplementary material for: Controllable hydrothermal-assisted synthesis of mesoporous Co3O4nanosheets
Source: Royal Society of Chemistry journal article supplement (doi:10.1039/c5ra19789a), 2015-01-01
Supplement: c5ra19789a1.pdf [file c5ra19789a1.pdf]

## Electronic Supplementary Material (ESI) for RSC Advance

# Controllable Hydrothermal-assisted Synthesis of Mesoporous $\text{Co}_3\text{O}_4$ Nanosheets

Xiulan Hu <sup>a,\*</sup>, Huihong Huang <sup>a,#</sup>, Jianbo Zhang <sup>a</sup>, Junjun Shi <sup>a</sup>, Shoufeng Zhu <sup>a</sup>, Nan Su <sup>a</sup>

We choose 300 °C as heat treatment temperature of hydrothermal products based on the TG and DSC curves and XRD results as shown in the following Fig. S1. These results (Fig. S1(a)) show that  $\text{Co}(\text{NH}_3)_5(\text{ONO})(\text{NO}_3)_2$  and  $\text{Co}(\text{CN})_2 \cdot \text{H}_2\text{O}$  hydrothermal products have already begin to decompose before 300 °C. After heat treatment at 300 °C for 3 h only  $\text{Co}_3\text{O}_4$  was detected. And compared two XRD results (Fig S1b) of heat treatment products obtained at 300 °C and 450 °C, the intensities of  $\text{Co}_3\text{O}_4$  diffraction peaks obviously became much strong when heat treatment was carried at 450 °C. These results clarified  $\text{Co}_3\text{O}_4$  may be easy sintering deformation at higher temperature. Therefore, we choose 300 °C as heat treatment temperature for hydrothermal products in order to avoid destroying original nanosheet structure) at high temperatures in this study.

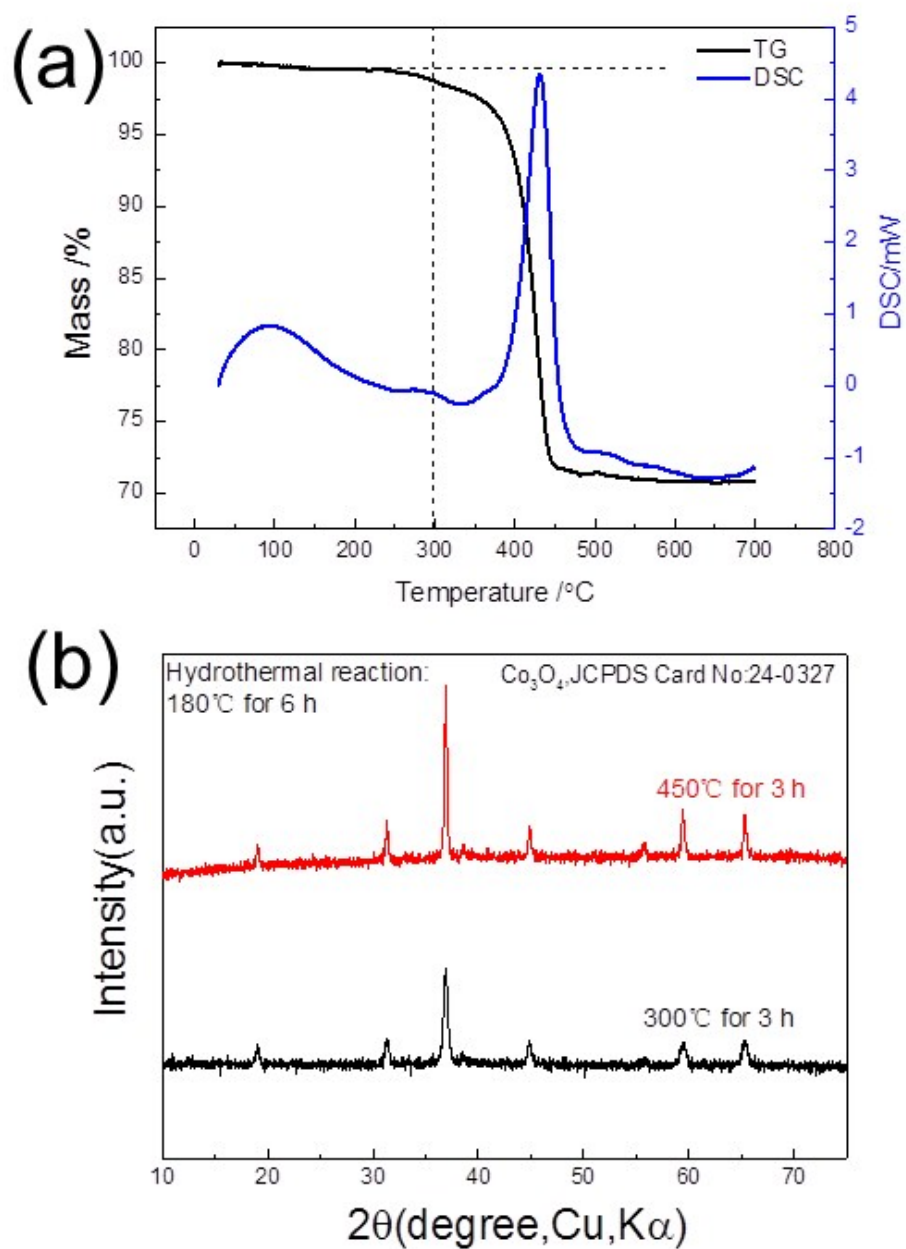

**Fig. S1** (a) TG and DSC curves of the  $\text{Co}(\text{NH}_3)_5(\text{ONO})(\text{NO}_3)_2$  and  $\text{Co}(\text{CN})_2 \cdot \text{H}_2\text{O}$  hydrothermal products, and (b) X-ray diffraction pattern of heat treatment products.

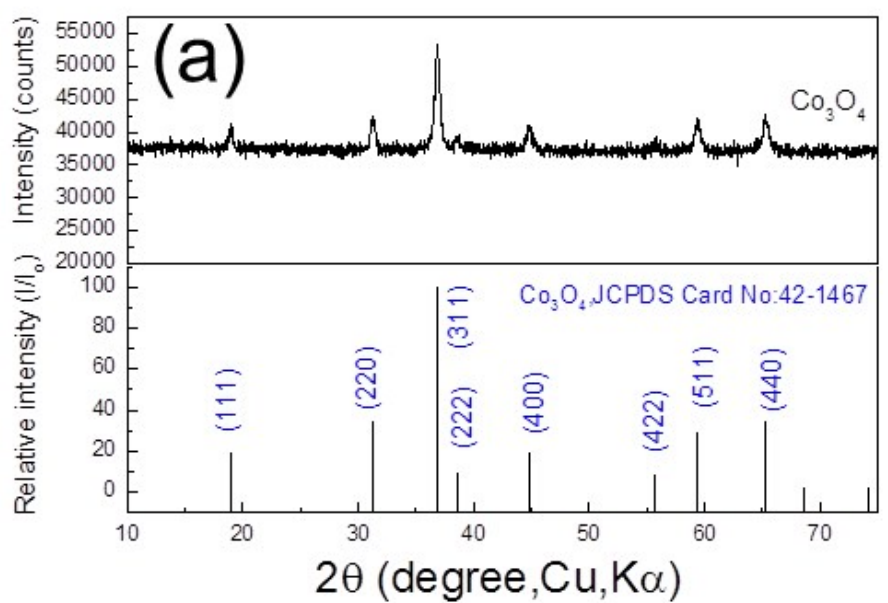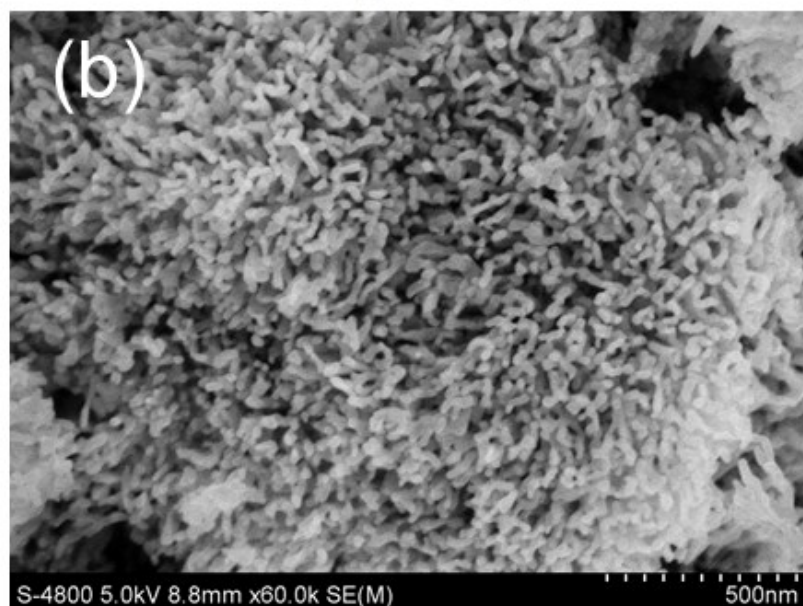

**Fig. S2** X-ray diffraction pattern (a) and SEM image (b) of pompon-like  $Co_3O_4$  synthesized by direct calcination of  $Co(NO_3)_2 \cdot 6H_2O$  at 300 °C for 3 h in the air.

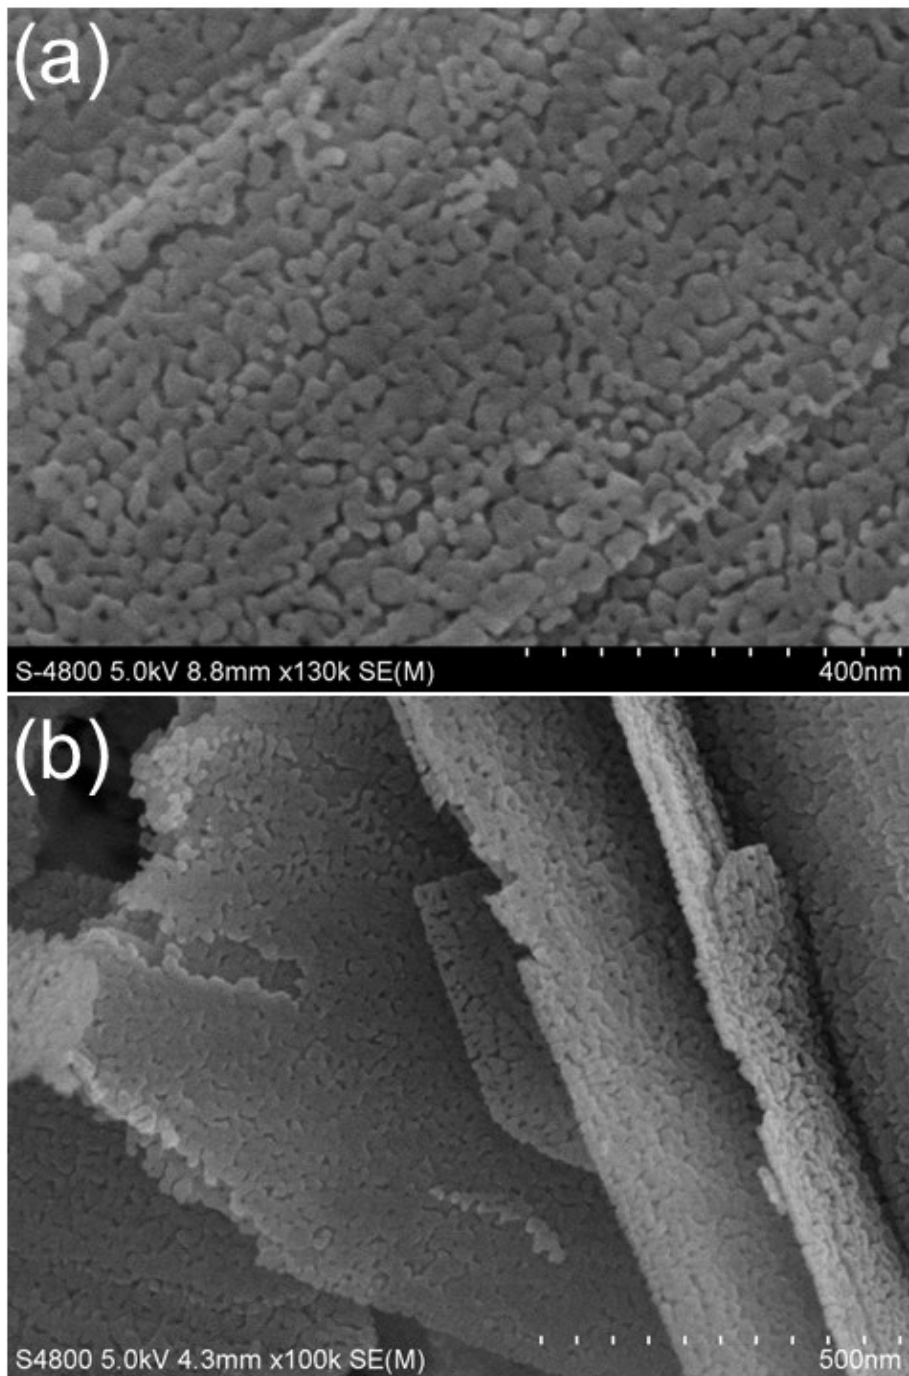

**Fig. S3** SEM images of mesoporous  $\text{Co}_3\text{O}_4$  nanosheets.

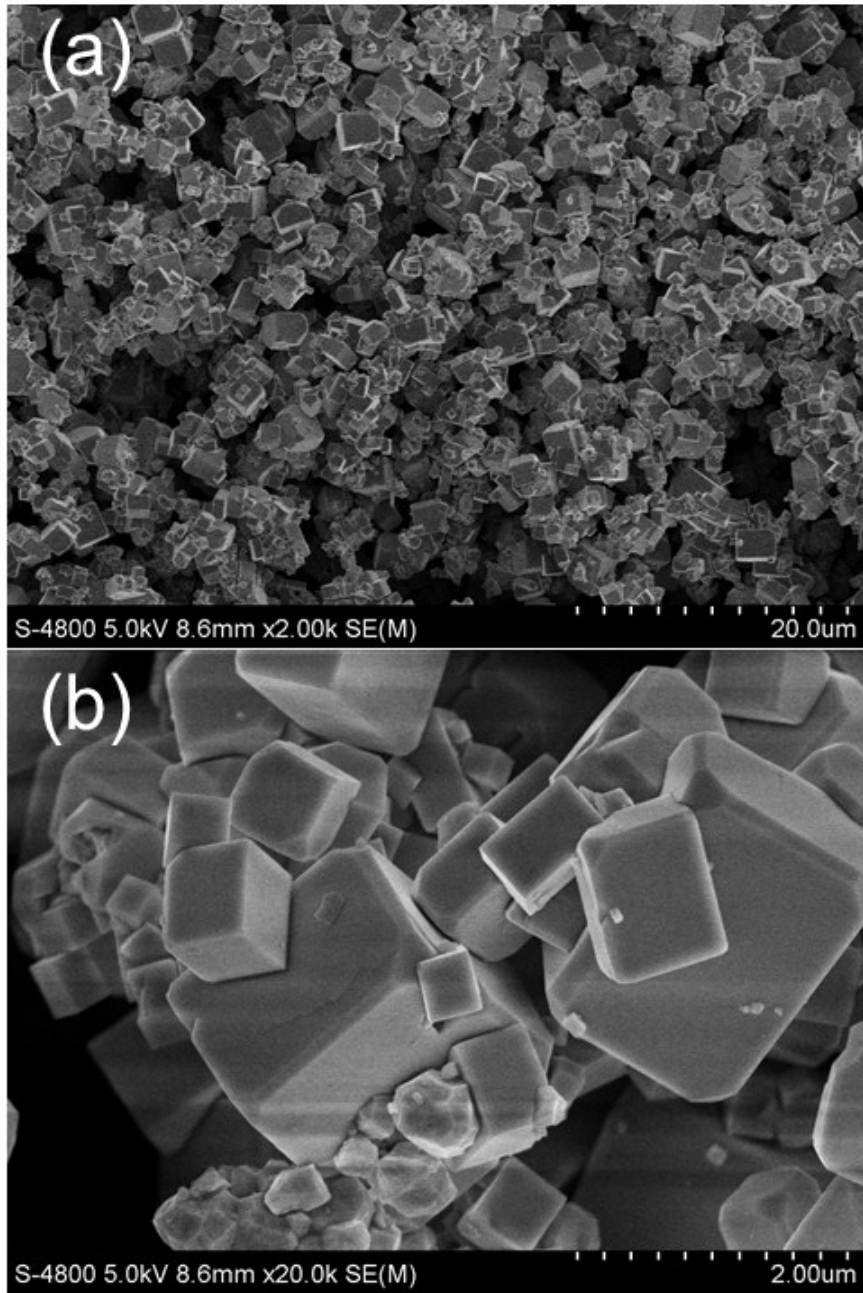

**Fig. S4** SEM images of micro-size cube-shaped  $\text{Co}_3\text{O}_4$  particles synthesized by hydrothermal method at  $300\text{ }^\circ\text{C}$  for 6 h.
